# Supplementary material for: Evaluating the Use of Selective Serotonin Reuptake Inhibitors (SSRIs) and Male Infertility: A Critical Retrospective Study
Source: MDPI journal article supplement (doi:10.3390/jcm13072129), 2024-04-07
Supplement: s1 [file s1]

## Supplementary online only material

Table S1

| Parameter           | Lower Reference Range | Description                                                                                                                             |
|---------------------|-----------------------|-----------------------------------------------------------------------------------------------------------------------------------------|
| <b>Volume</b>       | ≥ 1.5 mL              | The lower reference limit for semen volume; low volume may indicate pathological conditions or collection problems.                     |
| <b>Color</b>        | Whitish to gray       | Normal color of semen; red-brown appearance may indicate blood presence; yellow color may indicate jaundice or medication side effects. |
| <b>Liquefaction</b> | 15–30 min             | Time taken for semen to liquefy; necessary for sperm movement; delay can affect fertility.                                              |
| <b>Viscosity</b>    | Normal                | Normal semen viscosity shows small discrete drops; high viscosity can affect sperm motility and concentration.                          |

Table S2

| Parameter                 | Lower Reference Range |
|---------------------------|-----------------------|
| Total Motility            | 42%                   |
| Progressive Motility (PR) | 30%                   |
| Total Motile Sperm Count  | 39 million            |
| Normal Sperm Morphology   | 4%                    |
| Sperm Count               | 15 million/mL         |
